# Supplementary material for: Use of Extracorporeal Membrane Oxygenation as Bridge to Replacement Therapies in Cardiogenic Shock: Insights From the Extracorporeal Life Support Organization
Source: PubMed Central journal article supplement — Circ Heart Fail. 2021 Dec 9;15(1):e008777. doi: 10.1161/CIRCHEARTFAILURE.121.008777 (PMC8763251; doi:10.1161/circheartfailure.121.008777), 2021-12-09
Supplement: hhf-15-e008777-s001.pdf [file hhf-15-e008777-s001.pdf]

**SUPPLEMENTAL MATERIAL**

**1) Supplemental Tables**

| <b>Table I: Predictors of undergoing LVAD versus OHT (excluding ECPR and VV ECMOs)</b>                  |                   |                            |                |
|---------------------------------------------------------------------------------------------------------|-------------------|----------------------------|----------------|
|                                                                                                         | <b>Odds ratio</b> | <b>Confidence interval</b> | <b>P-value</b> |
| LVAD presence                                                                                           | 0.01              | 0.001 – 0.29               | 0.046          |
| Respiratory failure                                                                                     | 0.25              | 0.1 - 0.6                  | 0.003          |
| Milrinone                                                                                               | 0.37              | 0.18 – 0.74                | 0.006          |
| Cardiogenic shock                                                                                       | 0.38              | 0.19 – 0.76                | 0.007          |
| Weight                                                                                                  | 0.98              | 0.97 – 1                   | 0.03           |
| Cardiomyopathy                                                                                          | 2.1               | 1.08 – 4.32                | 0.03           |
| Inotropes on ECLS                                                                                       | 3.7               | 1.41 – 10.4                | 0.01           |
| Cardiac pacemaker                                                                                       | 6.3               | 1.35 – 47.6                | 0.04           |
| An OR<1 denotes an LVAD strategy is more likely while OR>1 denotes that an OHT strategy is more likely. |                   |                            |                |

| <b>Table II: Predictors of mortality in OHT group (excluding ECPR and VV ECMOs)</b> |                   |                            |                |
|-------------------------------------------------------------------------------------|-------------------|----------------------------|----------------|
|                                                                                     | <b>Odds ratio</b> | <b>Confidence interval</b> | <b>P-value</b> |
| ECMO discontinuation                                                                | 0.019             | 0.004 – 0.08               | <0.001         |
| Year of ECMO                                                                        | 0.025             | 0.004 – 0.13               | <0.001         |
| Renal replacement therapy                                                           | 2.85              | 1 – 8.8                    | 0.06           |
| Respiratory failure                                                                 | 5.8               | 1.38 – 26.6                | 0.018          |
| An OR>1 denotes increased mortality whereas OR<1 denotes decreased mortality.       |                   |                            |                |

|                                 | <b>Odds ratio</b> | <b>Confidence interval</b> | <b>P-value</b> |
|---------------------------------|-------------------|----------------------------|----------------|
| ECMO discontinuation            | 0.08              | 0.014 – 0.30               | <0.001         |
| Age                             | 1.08              | 1.03 – 1.14                | 0.002          |
| Surgical site bleeding          | 6.0               | 0.9 – 45.9                 | 0.07           |
| Peripheral cannulation bleeding | 22.1              | 2.7 – 290                  | 0.008          |

An OR>1 denotes increased mortality whereas OR<1 denotes decreased mortality.

|                                | <b>All Transplants<br/>N=206</b> | <b>2011-2017<br/>N=170</b> | <b>2019<br/>N=36</b> | <b>P-value</b> |
|--------------------------------|----------------------------------|----------------------------|----------------------|----------------|
| <i>Demographics</i>            |                                  |                            |                      |                |
| <b>Age (years, SD)</b>         | 45.8 ± 14.0                      | 45.2 ± 13.8                | 48.4 ± 14.7          | 0.21           |
| <b>Weight (kg, SD)</b>         | 78.2 ± 20.5                      | 77.8 ± 20.7                | 79.9 ± 20.5          | 0.58           |
| <b>Female</b>                  | 63 (30.6)                        | 53 (31.2)                  | 10 (27.8)            | 0.72           |
| <b>Race/Ethnicity</b>          |                                  |                            |                      | 0.0001         |
| White                          | 106 (51.5)                       | 85 (50)                    | 21 (58.3)            |                |
| Black                          | 18 (8.7)                         | 13 (7.6)                   | 5 (13.9)             |                |
| Asian                          | 48 (23.3)                        | 47 (27.6)                  | 1 (2.8)              |                |
| Hispanic                       | 10 (7.9)                         | 8 (4.7)                    | 2 (5.6)              |                |
| <i>Comorbidities</i>           |                                  |                            |                      |                |
| <b>Coronary artery disease</b> | 14 (6.8)                         | 11 (6.5)                   | 3 (8.3)              | 0.97           |
| <b>Cardiomyopathy</b>          | 103 (50.0)                       | 87 (51.2)                  | 16 (44.4)            | 0.58           |
| <b>Myocarditis</b>             | 10 (4.9)                         | 8 (4.7)                    | 2 (5.6)              | 1              |
| <b>Valvular disease</b>        | 10 (4.9)                         | 9 (5.3)                    | 1 (2.8)              | 0.83           |

|                                                                                                                                                                                                 |           |           |           |       |
|-------------------------------------------------------------------------------------------------------------------------------------------------------------------------------------------------|-----------|-----------|-----------|-------|
| <b>Congenital heart disease</b>                                                                                                                                                                 | 6 (2.9)   | 4 (2.4)   | 2 (5.6)   | 0.62  |
| <b>Arrhythmias</b>                                                                                                                                                                              | 31 (15)   | 26 (15.3) | 5 (13.9)  | 1     |
| <b>Hx of heart transplant</b>                                                                                                                                                                   | 6 (2.9)   | 6 (3.5)   | 0 (0)     | 0.55  |
| <b>LVAD presence</b>                                                                                                                                                                            | 1 (0.5)   | 1 (0.6)   | 0 (0)     | 1     |
| <b>Endocarditis</b>                                                                                                                                                                             | 4 (1.9)   | 3 (1.8)   | 1 (2.8)   | 1     |
| <b>Hypertension</b>                                                                                                                                                                             | 11 (5.3)  | 8 (4.7)   | 3 (8.3)   | 0.64  |
| <b>Hyperlipidemia</b>                                                                                                                                                                           | 8 (3.9)   | 7 (4.1)   | 1 (2.8)   | 1     |
| <b>Diabetes Mellitus</b>                                                                                                                                                                        | 14 (6.8)  | 10 (5.9)  | 4 (11.1)  | 0.44  |
| <b>CKD/ESRD</b>                                                                                                                                                                                 | 18 (8.7)  | 10 (5.9)  | 8 (22.2)  | 0.008 |
| <b>COPD</b>                                                                                                                                                                                     | 3 (1.5)   | 2 (1.2)   | 1 (2.8)   | 1     |
| <b>Encephalopathy/Neurologic disorder</b>                                                                                                                                                       | 12 (5.8)  | 9 (5.3)   | 3 (8.3)   | 0.45  |
| <b>Cerebrovascular Accident</b>                                                                                                                                                                 | 4 (1.9)   | 4 (2.4)   | 0 (0)     | 0.79  |
| <b>Anemia</b>                                                                                                                                                                                   | 23. (6.3) | 9 (5.3)   | 4 (11.1)  | 0.35  |
| <b>Thrombocytopenia</b>                                                                                                                                                                         | 5 (2.4)   | 4 (2.4)   | 1 (2.8)   | 1     |
| <b>Bleeding</b>                                                                                                                                                                                 | 13. (6.3) | 13 (7.9)  | 0 (0)     | 0.18  |
| <b>Cancer</b>                                                                                                                                                                                   | 3 (1.5)   | 3 (1.8)   | 0 (0)     | 0.97  |
| <i><b>Initial Presentation</b></i>                                                                                                                                                              |           |           |           |       |
| <b>Acute coronary syndrome</b>                                                                                                                                                                  | 17 (8.3)  | 15 (8.8)  | 2 (5.6)   | 0.75  |
| <b>Cardiogenic Shock</b>                                                                                                                                                                        | 81 (39.3) | 60 (35.3) | 21 (58.3) | 0.018 |
| <b>Cardiac arrest</b>                                                                                                                                                                           | 36 (17.5) | 27 (15.9) | 9 (25)    | 0.29  |
| <b>Cardiac transplant rejection/complication</b>                                                                                                                                                | 16 (7.8)  | 13 (7.6)  | 3 (8.3)   | 0.83  |
| <b>End-organ injury on presentation</b>                                                                                                                                                         |           |           |           |       |
| <b>Acute kidney injury</b>                                                                                                                                                                      | 30 (14.6) | 21 (12.4) | 9 (25)    | 0.09  |
| <b>Acid base disturbances</b>                                                                                                                                                                   | 5 (2.4)   | 4 (2.4)   | 1 (2.8)   | 1     |
| <b>Liver injury</b>                                                                                                                                                                             | 10 (4.9)  | 9 (5.3)   | 1 (2.8)   | 0.83  |
| CKD=Chronic kidney disease, COPD=Chronic obstructive pulmonary disease, ECMO=Extracorporeal membrane oxygenation, ESRD=End-stage renal disease, LVAD=Left ventricular assist device, Hx=History |           |           |           |       |

| <b>Table V: Hemodynamic and cardiac indices of transplant patients between 2011-2017 vs 2019</b> |                                      |                            |                      |                |
|--------------------------------------------------------------------------------------------------|--------------------------------------|----------------------------|----------------------|----------------|
|                                                                                                  | <b>All<br/>Transplants<br/>N=206</b> | <b>2011-2017<br/>N=170</b> | <b>2019<br/>N=36</b> | <b>P-value</b> |
| <b>Systolic blood pressure (mmHg)</b>                                                            | 84.0 ± 20.8                          | 83.1 ± 22.1                | 87.1 ± 15.8          | 0.35           |
| <b>Diastolic blood pressure (mmHg)</b>                                                           | 53.4 ± 13.6                          | 53.4 ± 14.5                | 53.3 ± 10.0          | 0.96           |
| <b>Mean blood pressure (mmHg)</b>                                                                | 62.3 ± 15.2                          | 61.7 ± 16.1                | 64.4 ± 11.8          | 0.40           |
| <b>Systolic pulmonary artery pressure (mmHg)</b>                                                 | 40.8 ± 14.2                          | 39.5 ± 15.7                | 43.9 ± 9.9           | 0.37           |
| <b>Diastolic pulmonary artery pressure (mmHg)</b>                                                | 24.9 ± 8.5                           | 25.0 ± 9.4                 | 23.8 ± 6.3           | 0.69           |
| <b>Mean pulmonary artery pressure (mmHg)</b>                                                     | 30.5 ± 9.5                           | 30.3 ± 10.5                | 31.0 ± 7.2           | 0.84           |
| <b>Pulmonary capillary wedge pressure (mmHg)</b>                                                 | 19.5 ± 9.9                           | 19.0 ± 11.0                | 21.5 ± 0.70          | 0.76           |
| <b>Cardiac Index (l/min/m<sup>2</sup>)</b>                                                       | 2.61 ± 2.9                           | 2.86 ± 3.37                | 1.96 ± 0.7           | 0.57           |
| <b>SvO<sub>2</sub> (%)</b>                                                                       | 58.19 ± 20.1                         | 63.9 ± 18.3                | 34.5 ± 13.7          | <0.001         |
| SvO <sub>2</sub> = Pulmonary artery oxygen saturation.                                           |                                      |                            |                      |                |

| <b>Table VI: ECMO specifications/information of transplant patients between 2011-2017 vs 2019</b>                                |                                  |                            |                      |                |
|----------------------------------------------------------------------------------------------------------------------------------|----------------------------------|----------------------------|----------------------|----------------|
|                                                                                                                                  | <b>All Transplants<br/>N=206</b> | <b>2011-2017<br/>N=170</b> | <b>2019<br/>N=36</b> | <b>P-value</b> |
| <b>ECMO Mode</b>                                                                                                                 |                                  |                            |                      | 0.38           |
| Venous-Arterial (VA)                                                                                                             | 184 (89.3)                       | 151 (88.8)                 | 33 (91.7)            |                |
| Venous-venous to Venous-arterial conversion                                                                                      | 5 (2.4)                          | 3 (1.8)                    | 5 (2.4)              |                |
| Venous-Venous-Arterial (VVA)                                                                                                     | 3 (1.5)                          | 2 (1.2)                    | 1 (2.8)              |                |
| Venous-Venous (VV)                                                                                                               | 6 (2.9)                          | 6 (3.5)                    | 0 (0)                |                |
| <b>Support Type</b>                                                                                                              |                                  |                            |                      | 0.90           |
| Cardiac                                                                                                                          | 185 (89.8)                       | 152 (89.4)                 | 33 (91.7)            |                |
| ECPR                                                                                                                             | 15 (7.3)                         | 13 (7.6)                   | 2 (5.6)              |                |
| Pulmonary                                                                                                                        | 6 (2.9)                          | 5 (2.9)                    | 1 (2.8)              |                |
| <b>Procedure Timing</b>                                                                                                          |                                  |                            |                      | 0.0045         |
| On-ECMO support                                                                                                                  | 153 (74.3)                       | 119 (70.0)                 | 34 (94.4)            |                |
| After ECMO support                                                                                                               | 53 (25.7)                        | 51 (30.0)                  | 2 (5.6)              |                |
| <b>Pre-ECMO Cardiac Arrest</b>                                                                                                   | 49 (23.8)                        | 41 (24.1)                  | 8 (22.2)             | 0.10           |
| ECMO=Extracorporeal membrane oxygenation; ECPR=Extracorporeal cardiopulmonary resuscitation; LVAD=Left ventricular assist device |                                  |                            |                      |                |

| <b>Table VII: Outcomes of transplant patients between 2011-2017 vs 2019</b> |                                  |                            |                      |                |
|-----------------------------------------------------------------------------|----------------------------------|----------------------------|----------------------|----------------|
|                                                                             | <b>All Transplants<br/>N=206</b> | <b>2011-2017<br/>N=170</b> | <b>2019<br/>N=36</b> | <b>P-value</b> |
| <b>Length of stay (days)</b>                                                | 56.9 ± 45.1                      | 58.0 ± 48.6                | 51.8 ± 24.5          | 0.45           |
| <b>In-Hospital Mortality</b>                                                | 58 (28.2)                        | 56 (32.9)                  | 2 (5.6)              | 0.002          |
| <b>ECMO support duration (hours)</b>                                        | 249.0 ± 335.8                    | 253.9 ± 352.4              | 225.9 ± 244.8        | 0.65           |
| ECMO=Extracorporeal membrane oxygenation                                    |                                  |                            |                      |                |

| <b>Table VIII: Predictors of decannulation before definitive treatment.</b> |                   |                                |                |
|-----------------------------------------------------------------------------|-------------------|--------------------------------|----------------|
|                                                                             | <b>Odds Ratio</b> | <b>95% Confidence Interval</b> | <b>P-value</b> |
| <b>Age</b>                                                                  | 0.98              | 0.96 – 1.00                    | 0.13           |
| <b>Gender</b>                                                               | 1.76              | 0.97 – 3.2                     | 0.06           |
| <b>Year of ECMO</b>                                                         | 0.41              | 0.17 – 0.94                    | 0.04           |
| <b>Discontinuation intent</b>                                               | 3.6               | 1.68 – 8.3                     | 0.001          |
| <b>Cardiac arrest</b>                                                       | 1.94              | 0.98 – 3.8                     | 0.05           |
| <b>IABP</b>                                                                 | 1.86              | 1 – 3.47                       | 0.048          |
| <b>Cardiac transplant rejection</b>                                         | 5.77              | 0.89 – 48.4                    | 0.07           |

| <b>Table IX: Demographics and baseline characteristics by ACS</b> |                                   |                                  |                |                              |                         |                |
|-------------------------------------------------------------------|-----------------------------------|----------------------------------|----------------|------------------------------|-------------------------|----------------|
|                                                                   | <b>Non-ACS<br/>LVAD<br/>N=126</b> | <b>Non-ACS<br/>OHT<br/>N=215</b> | <b>P value</b> | <b>ACS<br/>LVAD<br/>N=41</b> | <b>ACS OHT<br/>N=19</b> | <b>P value</b> |
| <i>Demographics</i>                                               |                                   |                                  |                |                              |                         |                |
| <b>Age (years, SD)</b>                                            | 49.5 ± 15.0                       | 45.7 ± 14.0                      | 0.019          | 54.6 ± 10.2                  | 46.4 ± 11.0             | 0.006          |
| <b>Weight (kg, SD)</b>                                            | 88.7 ± 23.1                       | 78.3 ± 20.6                      | <0.001         | 89.1 ± 20.7                  | 77.4 ± 16.1             | 0.054          |
| <b>Female</b>                                                     | 32 (25.4)                         | 66 (30.7)                        | 0.27           | 12 (29.3)                    | 7 (36.8)                | 0.77           |
| <b>Race/Ethnicity</b>                                             |                                   |                                  | 0.003          |                              |                         | 0.08           |
| White                                                             | 78 (61.9)                         | 110 (51.2)                       |                | 28 (68.3)                    | 10 (52.6)               |                |
| Black                                                             | 18(14.3)                          | 19 (8.8)                         |                | 4 (9.8)                      | 1 (5.3)                 |                |
| Asian                                                             | 9 (7.1)                           | 48 (22.3)                        |                | 2 (4.9)                      | 5 (26.3)                |                |
| Hispanic                                                          | 6 (4.8)                           | 11 (5.1)                         |                | 0 (0.0)                      | 2 (10.5)                |                |
| <i>Comorbidities</i>                                              |                                   |                                  |                |                              |                         |                |
| <b>Coronary artery disease</b>                                    | 15 (11.9)                         | 11 (5.1)                         | 0.04           | 10 (24.4)                    | 5 (26.3)                | 1              |
| <b>Cardiomyopathy</b>                                             | 48 (38.1)                         | 112 (52.1)                       | 0.02           | 12 (29.3)                    | 6 (31.6)                | 1              |
| <b>Myocarditis</b>                                                | 6 (4.8)                           | 12 (5.6)                         | 0.93           | 0 (0)                        | 1 (5.3)                 | 0.69           |
| <b>Valvular disease</b>                                           | 9 (7.1)                           | 9 (4.2)                          | 0.78           | 1 (2.4)                      | 2 (10.5)                | 0.48           |
| <b>Congenital heart disease</b>                                   | 0 (0)                             | 6 (2.8)                          | 0.14           | 0 (0)                        | 1 (5.3)                 | 0.69           |
| <b>Arrhythmias</b>                                                | 18 (14.3)                         | 34 (15.8)                        | 0.82           | 6 (14.6)                     | 0 (0)                   | 0.19           |
| <b>Hx of heart transplant</b>                                     | 0 (0)                             | 20 (9.3)                         | 0.001          | 1 (2.4)                      | 2 (10.5)                | 0.48           |
| <b>LVAD presence</b>                                              | 8 (6.3)                           | 1 (0.5)                          | 0.003          | 3 (7.3)                      | 0 (0)                   | 0.56           |
| <b>Hypertension</b>                                               | 8 (6.3)                           | 9 (4.2)                          | 0.53           | 3 (7.3)                      | 2 (10.5)                | 1              |
| <b>Hyperlipidemia</b>                                             | 2 (1.6)                           | 9 (4.2)                          | 0.32           | 6 (14.6)                     | 1 (5.3)                 | 0.53           |
| <b>Diabetes Mellitus</b>                                          | 15 (11.9)                         | 16 (7.4)                         | 0.23           | 6 (14.6)                     | 2 (10.5)                | 0.97           |
| <b>CKD/ESRD</b>                                                   | 12 (9.5)                          | 18 (8.4)                         | 0.20           | 3 (7.3)                      | 0 (0)                   | 1              |
| <b>COPD</b>                                                       | 4 (3.2)                           | 4 (1.9)                          | 0.68           | 3 (7.3)                      | 0 (0)                   | 0.56           |
| <b>Encephalopathy/Neurologic disorder</b>                         | 9 (7.1)                           | 14 (6.5)                         | 0.9            | 5 (10.2)                     | 0 (0)                   | 0.56           |
| <b>Cerebrovascular Accident</b>                                   | 1 (0.8)                           | 3 (1.4)                          | 1              | 1 (2.4)                      | 1 (5.3)                 | 1              |
| <b>Anemia</b>                                                     | 7 (5.6)                           | 12 (5.6)                         | 1              | 3 (7.3)                      | 2 (10.5)                | 1              |
| <b>Thrombocytopenia</b>                                           | 6 (4.8)                           | 5 (2.3)                          | 0.36           | 1 (2.4)                      | 1 (5.3)                 | 1              |
| <b>Bleeding</b>                                                   | 3 (2.4)                           | 11 (5.1)                         | 0.34           | 3 (7.3)                      | 2 (10.5)                | 1              |
| <b>Cancer</b>                                                     | 5 (4)                             | 3 (1.4)                          | 0.25           | 0 (0)                        | 0 (0)                   | NA             |
| <i>Initial Presentation</i>                                       |                                   |                                  |                |                              |                         |                |



|                                                                                                                                                                                                 |           |           |       |           |           |      |
|-------------------------------------------------------------------------------------------------------------------------------------------------------------------------------------------------|-----------|-----------|-------|-----------|-----------|------|
| <b>Acute coronary syndrome</b>                                                                                                                                                                  | NA        | NA        | NA    | 41        | 19        | NA   |
| <b>Cardiogenic Shock</b>                                                                                                                                                                        | 88 (69.8) | 79 (36.7) | 0.001 | 36 (87.8) | 12 (36.2) | 0.06 |
| <b>Cardiac arrest</b>                                                                                                                                                                           | 31 (24.6) | 36 (16.7) | 0.10  | 17 (41.5) | 6 (31.6)  | 0.65 |
| <b>End-organ injury on presentation</b>                                                                                                                                                         |           |           |       |           |           |      |
| <b>Acute kidney injury</b>                                                                                                                                                                      | 27 (21.4) | 30 (14)   | 0.10  | 15 (36.6) | 5 (26.3)  | 0.62 |
| <b>Acid base disturbances</b>                                                                                                                                                                   | 7 (5.6)   | 5 (2.3)   | 0.20  | 4 (9.8)   | 1 (5.3)   | 0.93 |
| <b>Liver injury</b>                                                                                                                                                                             | 7 (5.6)   | 10 (4.7)  | 0.91  | 5 (12.2)  | 0 (0)     | 0.27 |
| CKD=Chronic kidney disease, COPD=Chronic obstructive pulmonary disease, ECMO=Extracorporeal membrane oxygenation, ESRD=End-stage renal disease, LVAD=Left ventricular assist device, Hx=History |           |           |       |           |           |      |

| <b>Table X: Hemodynamics by ACS</b>               |                                   |                                  |                |                              |                         |                |
|---------------------------------------------------|-----------------------------------|----------------------------------|----------------|------------------------------|-------------------------|----------------|
|                                                   | <b>Non-ACS<br/>LVAD<br/>N=126</b> | <b>Non-ACS<br/>OHT<br/>N=215</b> | <b>P value</b> | <b>ACS<br/>LVAD<br/>N=41</b> | <b>ACS OHT<br/>N=19</b> | <b>P value</b> |
| <b>Systolic blood pressure (mmHg)</b>             | 88.7 ± 20.1                       | 84.9 ± 21.9                      | 0.18           | 91.2 ± 26.4                  | 90.6 ± 15.0             | 0.95           |
| <b>Diastolic blood pressure (mmHg)</b>            | 58.3 ± 15.0                       | 53.9 ± 13.5                      | 0.02           | 59.5 ± 23.3                  | 55.1 ± 12.4             | 0.59           |
| <b>Mean blood pressure (mmHg)</b>                 | 69.2 ± 15.6                       | 63.0 ± 15.8                      | 0.006          | 69.2 ± 24.0                  | 65.1 ± 13.3             | 0.61           |
| <b>Systolic pulmonary artery pressure (mmHg)</b>  | 44.8 ± 13.3                       | 40.6 ± 14.3                      | 0.16           | 40.4 ± 11.1                  | 32 ± 7.6                | 0.18           |
| <b>Diastolic pulmonary artery pressure (mmHg)</b> | 26.0 ± 7.9                        | 24.6 ± 8.5                       | 0.41           | 24.7 ± 8.0                   | 20.8 ± 6.0              | 0.38           |
| <b>Mean pulmonary artery pressure (mmHg)</b>      | 33.5 ± 9.2                        | 30.6 ± 9.7                       | 0.17           | 30.5 ± 8.6                   | 24.6 ± 5.1              | 0.24           |
| <b>Pulmonary capillary wedge pressure (mmHg)</b>  | 24.4 ± 8.9                        | 19.5 ± 9.9                       | 0.23           | 27.0 ± 8.5                   | 26.0 ± 0                | 0.92           |
| <b>Cardiac Index (l/min/m<sup>2</sup>)</b>        | 2.02 ± 0.8                        | 2.52 ± 2.7                       | 0.42           | 1.93 ± 0.3                   | 1.71 ± 0.4              | 0.29           |
| <b>SvO<sub>2</sub> (%)</b>                        | 50.8 ± 17.6                       | 56.0 ± 20.1                      | 0.33           | 61.9 ± 18.5                  | 70.7 ± 20.1             | 0.5            |

| <b>Table XI: ECMO specifications/information by ACS</b> |                                   |                                  |                |                              |                         |                |
|---------------------------------------------------------|-----------------------------------|----------------------------------|----------------|------------------------------|-------------------------|----------------|
|                                                         | <b>Non-ACS<br/>LVAD<br/>N=126</b> | <b>Non-ACS<br/>OHT<br/>N=215</b> | <b>P value</b> | <b>ACS<br/>LVAD<br/>N=41</b> | <b>ACS OHT<br/>N=19</b> | <b>P value</b> |
| <b>ECMO Mode</b>                                        |                                   |                                  | 0.035          |                              |                         | 0.10           |
| Venous-Arterial (VA)                                    | 107 (84.9)                        | 192 (89.3)                       |                | 36 (87.8)                    | 18 (94.7)               |                |
| Venous-venous to Venous-arterial conversion             | 13 (10.3)                         | 6 (2.8)                          |                | 5 (12.2%)                    | 0 (0)                   |                |
| Venous-Venous-Arterial (VVA)                            | 3 (2.4)                           | 3 (1.4)                          |                | 0 (0)                        | 1 (5.3)                 |                |
| Venous-Venous (VV)                                      | 2 (1.6)                           | 6 (2.8)                          |                | NA                           | NA                      |                |
| <b>Support Type</b>                                     |                                   |                                  | 0.22           |                              |                         | 0.80           |
| Cardiac                                                 | 113 (89.7)                        | 194 (90.2)                       |                | 37 (90.2)                    | 16 (84.2)               |                |
| ECPR                                                    | 12 (9.5)                          | 14 (6.5)                         |                | 4 (9.8)                      | 3 (15.8)                |                |
| Pulmonary                                               | 1 (0.8)                           | 7 (3.3)                          |                | 0 (0.0)                      | 0 (0)                   |                |
| <b>Procedure Timing</b>                                 |                                   |                                  | 0.11           |                              |                         | 0.03           |
| On-ECMO support                                         | 109 (86.5)                        | 170 (79.1)                       |                | 34 (82.9)                    | 10 (52.6)               |                |
| After ECMO support                                      | 17 (13.5)                         | 45 (20.9)                        |                | 7 (17.1)                     | 9 (47.4)                |                |
| <b>Pre-ECMO Cardiac Arrest</b>                          | 42 (33.3)                         | 43 (20.0)                        | 0.02           | 17 (41.5)                    | 8 (42.1)                | 1              |

| <b>Table XII: Outcomes by ACS</b>    |                                   |                                  |                |                              |                         |                |
|--------------------------------------|-----------------------------------|----------------------------------|----------------|------------------------------|-------------------------|----------------|
|                                      | <b>Non-ACS<br/>LVAD<br/>N=126</b> | <b>Non-ACS<br/>OHT<br/>N=215</b> | <b>P value</b> | <b>ACS<br/>LVAD<br/>N=41</b> | <b>ACS OHT<br/>N=19</b> | <b>P value</b> |
| <b>Length of stay (days)</b>         | 54 ± 48                           | 58 ± 48                          | 0.43           | 36 ± 62                      | 75 ± 45                 | 0.02           |
| <b>In-Hospital Mortality</b>         | 36 (28.6)                         | 66 (30.7)                        | 0.77           | 12 (29.3)                    | 2 (10.5)                | 0.20           |
| <b>ECMO support duration (hours)</b> | 231 ± 193                         | 289 ± 488                        | 0.20           | 205 ± 140                    | 215 ± 266               | 0.84           |

Standardized data collection form for the ELSO registry:

[https://www.else.org/Portals/0/Files/PDF/ELSOECLSRegistryForm8.0\\_2020.pdf](https://www.else.org/Portals/0/Files/PDF/ELSOECLSRegistryForm8.0_2020.pdf)
